# Supplementary material for: Guadecitabine increases response to combined anti-CTLA-4 and anti-PD-1 treatment in mouse melanoma in vivo by controlling T-cells, myeloid derived suppressor and NK cells
Source: PubMed Central journal article supplement (PMC10024396; doi:10.1186/s13046-023-02628-x), 2023-03-18

## A Spleen Gating strategy

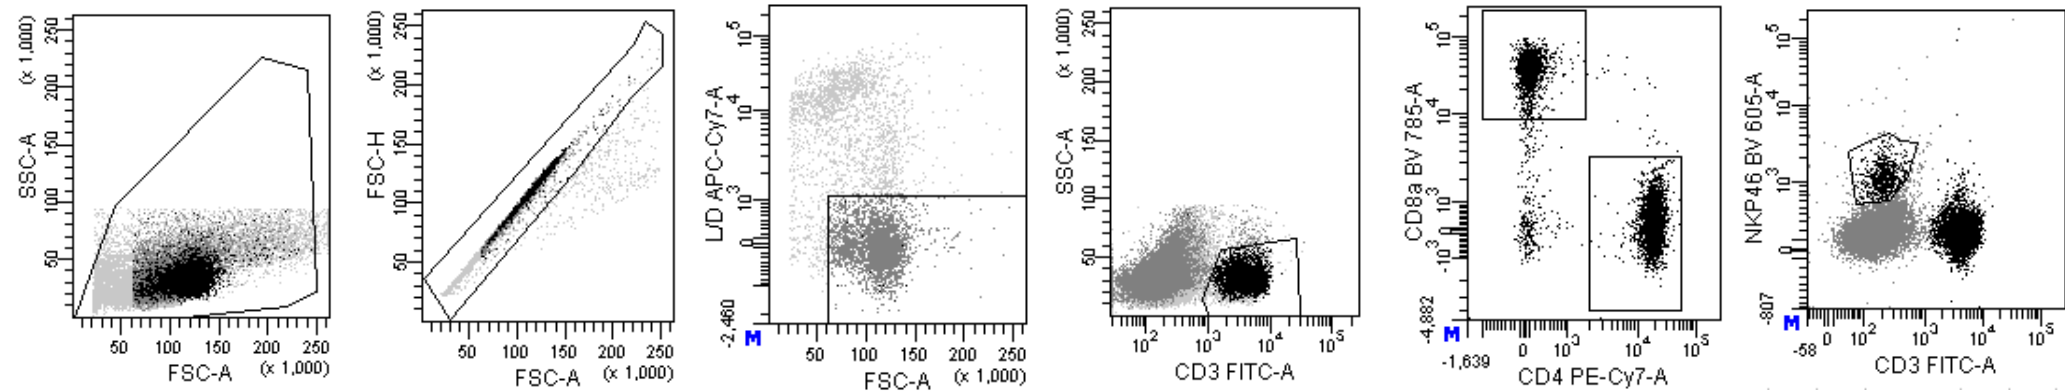

## B LN Gating strategy

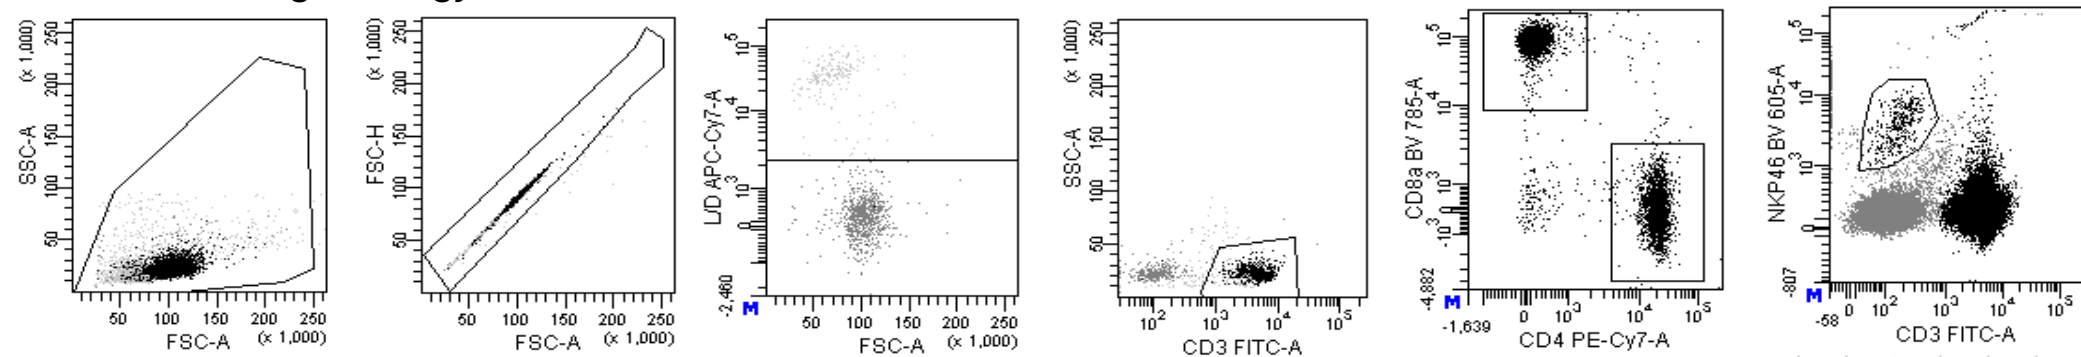

Supplement: 13046_2023_2628_MOESM3_ESM.pdf [file 13046_2023_2628_MOESM3_ESM.pdf]
