# Supplementary material for: Guadecitabine increases response to combined anti-CTLA-4 and anti-PD-1 treatment in mouse melanoma in vivo by controlling T-cells, myeloid derived suppressor and NK cells
Source: PubMed Central journal article supplement (PMC10024396; doi:10.1186/s13046-023-02628-x), 2023-03-18
Supplement: 13046_2023_2628_MOESM5_ESM.pdf [file 13046_2023_2628_MOESM5_ESM.pdf]

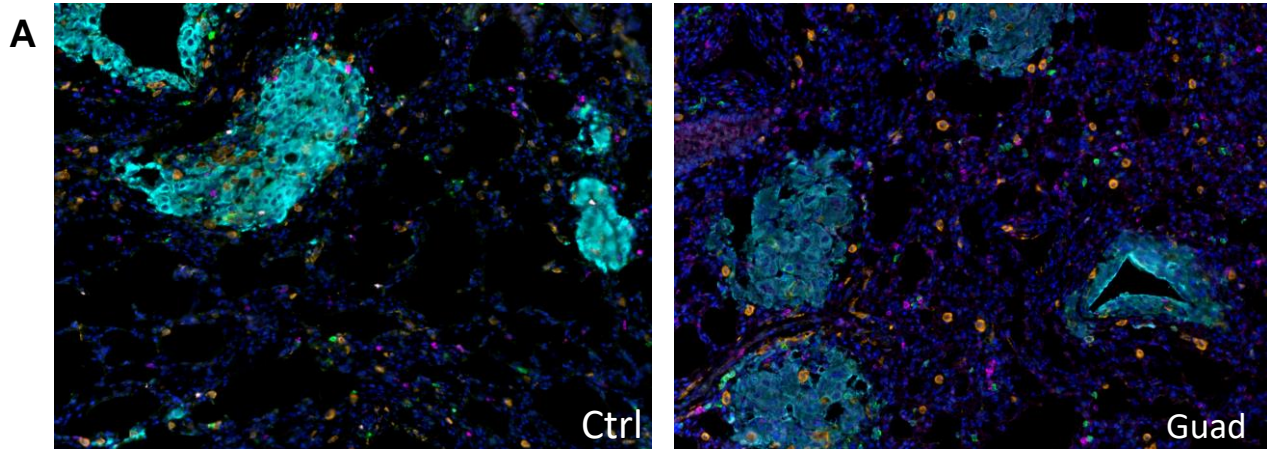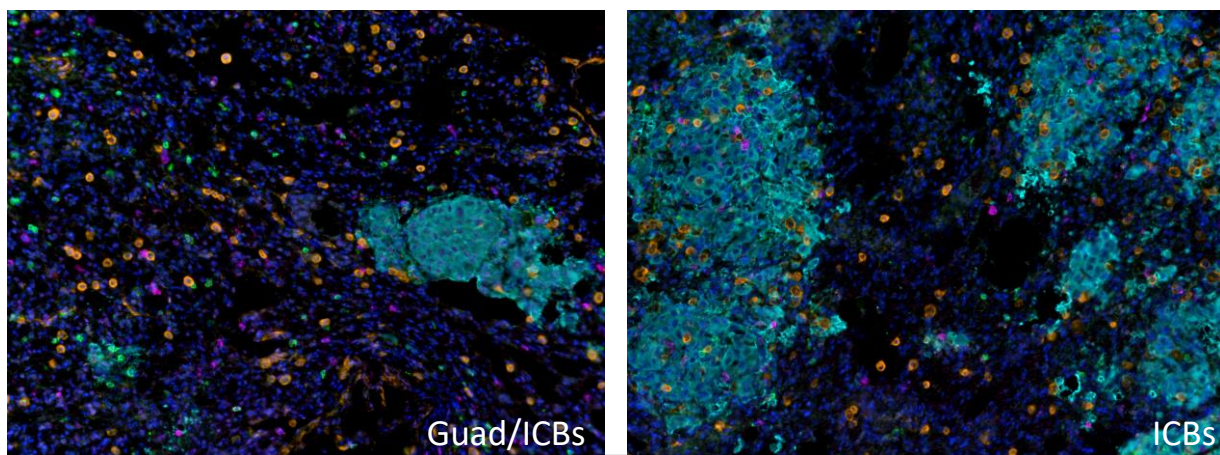

melanoma CD206 CD8a CD4 F4/80 Ly6C Ly6G Foxp3 DAPI

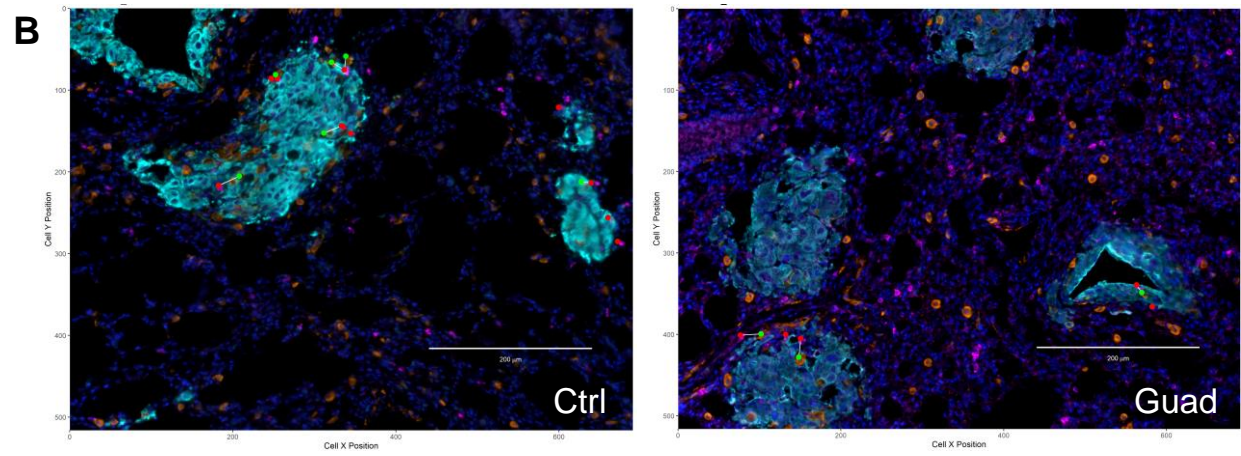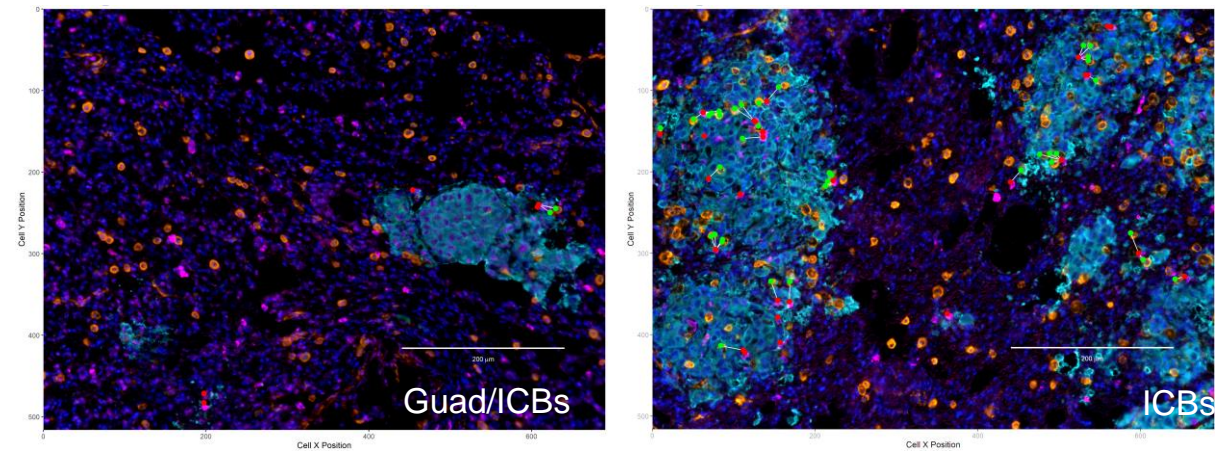

● CD8+ ● CD206+ cells <30μm from CD8+
